# Supplementary material
Source: Springer Nature journal article supplement (https://www.springermedizin.de/resource/supplementary/12891_2011_1310_MOESM2_ESM.pdf/9507564)

Screening for eligibility

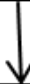

Check inclusion, baseline assessment, informed consent

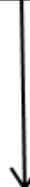

Allocation

Excluded  
•Not meeting inclusion criteria  
•Declined to participate  
•Other reasons

Pain management (control)

Pain management and training (intervention)

Documentation drop outs

Documentation drop outs

Follow up assessment 4 months and 12 months post treatment start

Follow up assessment 4 months and 12 months post treatment start

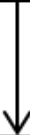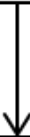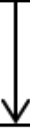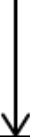

Supplement: MOESM2 [file 9507564]
